# Supplementary material for: The photosensitizer system based on cationic COF carrier with the loading tetraminoporphyrin and its combined antibacterial effect
Source: Royal Society of Chemistry journal article supplement (doi:10.1039/d4nj01766h), 2024-01-01
Supplement: d4nj01766h1.pdf [file d4nj01766h1.pdf]

## Supporting Information

### **The photosensitizer system based on cationic COF carrier with the loading tetraminoporphyrin and its combined antibacterial effect**

Ling Li<sup>‡a, d</sup>, Jing Ma<sup>‡a, d</sup>, Yuan Cui<sup>a, \*</sup>, Chong Liu<sup>a, d</sup>, Hao Li<sup>a, b</sup>, Dayang Xie<sup>b</sup>, Tinghong Wang<sup>c, \*</sup>, Yanwei Li<sup>a</sup> and Yanhui Li<sup>a, b, \*</sup>

<sup>a</sup> *Changchun University of Science and Technology, Changchun, 130022, PR China*

<sup>b</sup> *School of Materials Science and Engineering, Xiamen University of Technology, Xiamen 361024, China*

<sup>c</sup> *People's Hospital of Altay City , Xinjiang, 836500, PR China*

<sup>d</sup> *Key Laboratory of Polymer Ecomaterials, Changchun Institute of Applied Chemistry, Chinese Academy of Sciences, Changchun, 130022, PR China.*

‡These authors contributed equally: Ling Li, Jing Ma.

\* Corresponding author.

mail addresses: [cuiyuan@cust.edu.cn](mailto:cuiyuan@cust.edu.cn)(Y. Cui), [wangtinghong0524@126.com](mailto:wangtinghong0524@126.com) (T. Wang), [lyh2008@cust.edu.cn](mailto:lyh2008@cust.edu.cn) (Y. Li)

### *Experimental drugs and reagents*

4-nitrobenzaldehyde (analytical pure,  $\geq 99.5\%$ ) was purchased from Sinopharm Chemical Reagent Co., Ltd.; acetic anhydride (99%),  $\text{SnCl}_2 \cdot 2\text{H}_2\text{O}$  ( $\geq 99.99\%$ ) were purchased from Sigma-Aldrich; propionic acid ( $\geq 99.5\%$ ), pyrrole ( $\geq 99.7\%$ ), pyridine (anhydrous grade, 99.8%) were purchased from Aladdin; methanol (analytical pure), hydrochloric acid (analytical pure), ammonia (analytical pure, 25%), dimethyl sulfoxide (analytical pure), absolute ethanol, N,N-dimethylacetamide, acetone were purchased from Beijing Chemical plant.

### *Preparation of 5,10,15, 20-tetri (4-nitrophenyl) porphyrin (THPP)*

22 g ( $1.45 \times 10^{-1}$  mol) 4-nitrobenzaldehyde was accurately weighed by an analytical balance and added to a 1 L two-port round-bottom flask, then 24 mL ( $2.54 \times 10^{-1}$  mol) acetic anhydride and 600 mL propionic acid were added, and then the condensation reflux device was connected after magnetic stirring. Then the temperature was gradually raised to 138 °C, and 10 mL ( $1.44 \times 10^{-1}$  mol) of newly steamed pyrrole was slowly added to it. After reflux for 30 min, the mixture was cooled to room temperature, and the precipitate was collected through filtration, washed with  $\text{H}_2\text{O}$  and methanol three times respectively, and dried at 60 °C in a vacuum drying oven. The obtained powder was dissolved in 160 mL pyridine, which was reflow at 138 °C for 1 h, cooled to room temperature, filtered to collect the precipitate, and washed with acetone, and finally obtained 5,10,15, 20-tetri (4-nitrophenyl) porphyrin with a deep purple yield of 14%.

*Preparation of 5,10,15,20-tetrakis(4-aminophenyl) porphyrin (TAPP)*

4.13 g ( $5.19 \times 10^{-3}$  mol) tetranitrophenyl porphyrin was dissolved in 500 mL hydrochloric acid solution at 70 °C, and 18.0 g ( $7.97 \times 10^{-2}$  mol)  $\text{SnCl}_2 \cdot 2\text{H}_2\text{O}$  was added to the solution. The resulting mixture was stirred at 70 °C for 30 min, and then cooled to 0 °C. Finally, it is neutralized with ammonia solution, collected by filtration and so on to obtain gray crystal product and dissolve it in acetone, rotate evaporation solution, and then vacuum drying to obtain TAPP, purple crystal powder.

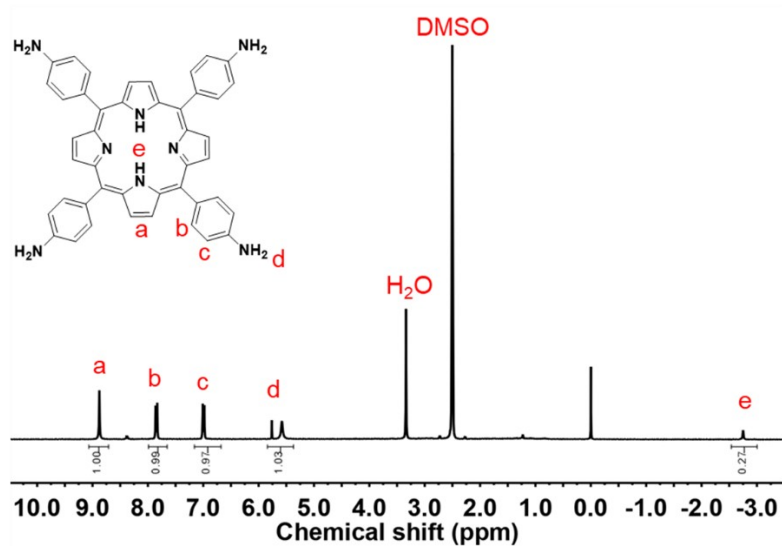

**Fig. S1.**  $^1\text{H}$  NMR of TAPP.

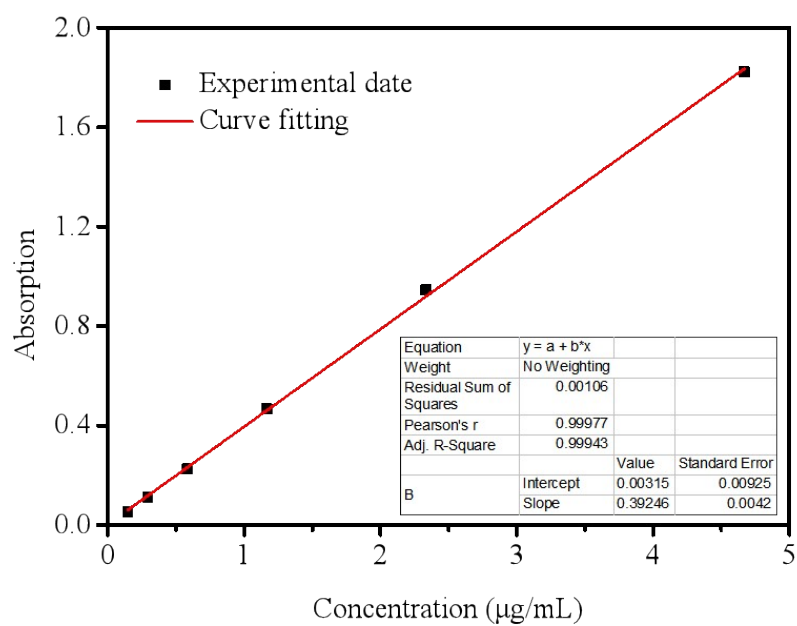

**Fig. S2.** UV absorption and concentration curves of TAPP at 438 nm.

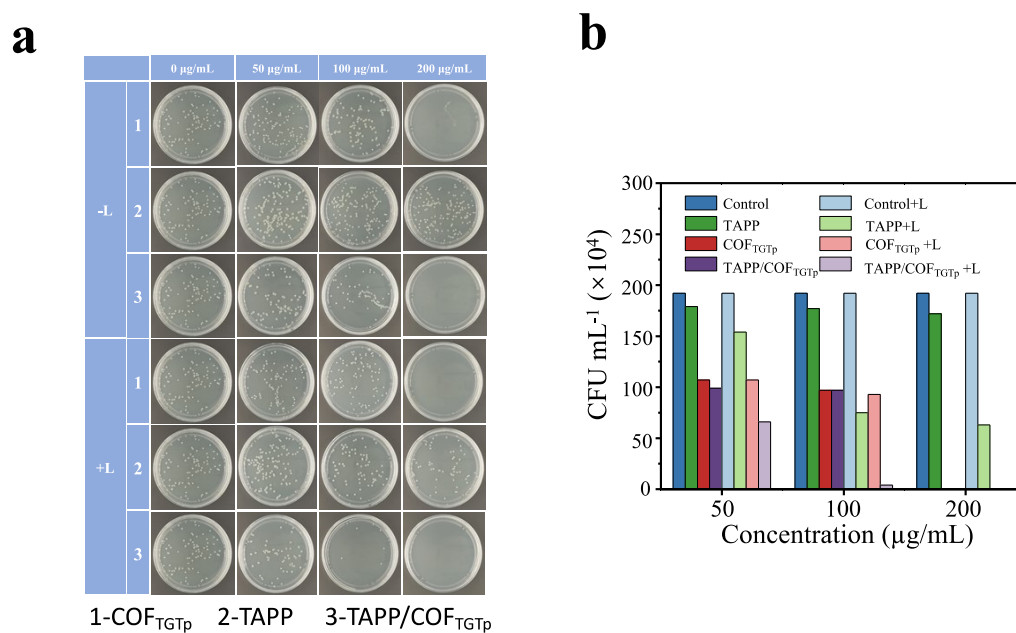

**Fig. S3.** COF<sub>TGTP</sub>, TAPP and TAPP/COF<sub>TGTP</sub> *E. coli* plate counting experiment both under dark and light (10 mW/cm<sup>2</sup>) irradiation; (a) Optical photo of antibacterial agar plate; (b) Bar graph of colony number.

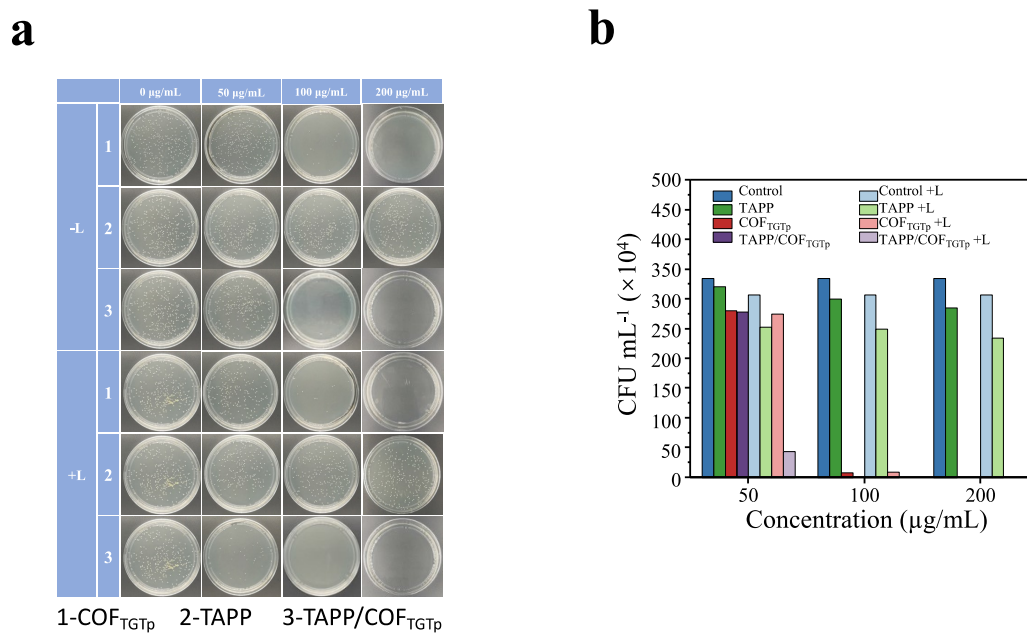

**Fig. S4.** CO<sub>TGTP</sub>, TAPP and TAPP/CO<sub>TGTP</sub> *S. aureus* plate counting experiment both under dark and light (10 mW/cm<sup>2</sup>) irradiation; (a) Optical photo of antibacterial agar plate; (b) Bar graph of colony number.

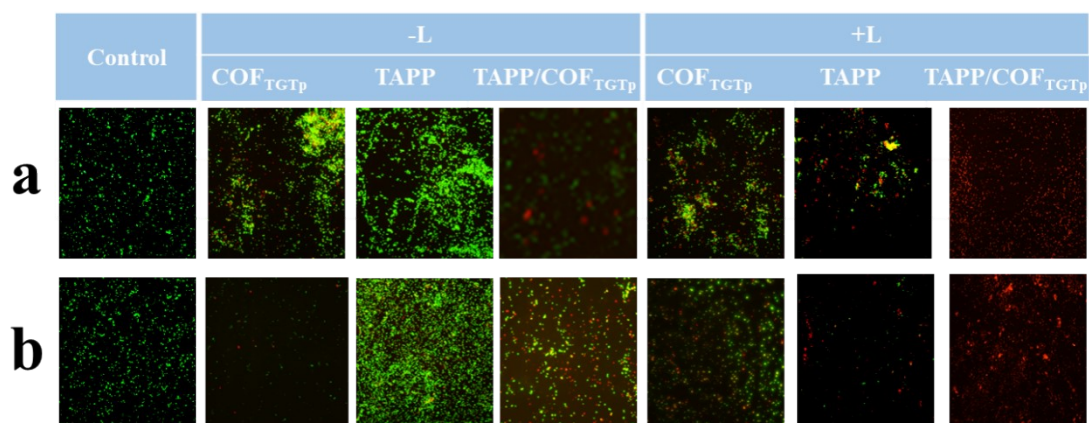

**Fig. S5.** Live and dead staining of bacteria treated with CO<sub>TGTP</sub>, TAPP and TAPP/CO<sub>TGTP</sub> both under dark and light (10 mW/cm<sup>2</sup>) irradiation; (a) *E. coli*; (b) *S. aureus* (Scale bars, 25  $\mu\text{m}$ , green represents live bacteria, red represents dead bacteria).
